# Supplementary material
Source: publisher figshare collection journal article supplement (https://karger.figshare.com/ndownloader/files/22028523)
Supplement: Supplementary file 1 [file 22028523]

**Test-retest reliability of frontal alpha-asymmetry during presentation of emotional face-stimuli in healthy subjects**

Kristin Koller-Schlaud a,b, Julia Querbach a, Joachim Behr a,b,c, Andreas Ströhle a, Johannes Rentzsch a,b

a Department of Psychiatry and Psychotherapy, Charité - Universitätsmedizin Berlin, Campus Charité Mitte, Charitéplatz 1, 10117 Berlin, Germany

b Department of Psychiatry, Psychotherapy and Psychosomatics, Brandenburg Medical School Theodor Fontane, Fehrbelliner Straße 38, 16816 Neuruppin, Germany

c Faculty of Health Science Brandenburg, Joint Faculty of the University of Potsdam, Brandenburg University of Technology Cottbus-Senftenberg and Brandenburg Medical School Theodor Fontane, Karl-Liebknecht-Str. 24-25, 14476 Potsdam, Germany

**Supplement Tables**

**Supplement table 1**: Given are number and SD of correct and incorrect idenditfied changes in emotional face expressions (happy, sad), within- and between-sessions and statistical comparisons and Pearson's correlations. In sum, there were 36 target faces for each emotion. Please note: missings = sum of target faces – (sum of correct + sum of incorrect). Not corrected for multiple comparisons.

| **Block** | **1st block** | | | **2nd block** | | **Pearson correlation** | | **t-Test** | |
| --- | --- | --- | --- | --- | --- | --- | --- | --- | --- |
|  | **M** | **SD** | | **M** | **SD** | **r** | **p** | **t** | **p** |
| **happy condition: correct** | 18.1 | 3.9 | | 18.4 | 3.3 | **.88** | **.0001** | -.79 | .4 |
| **happy condition: incorrect** | 9.0 | 1.8 | | 8.7 | 2.0 | **.79** | **.0001** | 1.00 | .3 |
| **sad condition: correct** | 19.7 | 3.2 | | 19.2 | 3.6 | **.77** | **.0001** | 1.00 | .3 |
| **sad condition: incorrect** | 9.8 | 1.7 | | 9.3 | 1.7 | **.58** | **.004** | 1.77 | .1 |
| **Session** | **1st session** | | | **2nd session** | | **Pearson correlation** | | **t-Test** | |
|  | **M** | | **SD** | **M** | **SD** | **r** | **p** | **t** | **p** |
| **happy condition: correct** | 18.5 | | 4.1 | 18.1 | 4.7 | .24 | .3 | .35 | .7 |
| **happy condition: incorrect** | 9.0 | | 2.3 | 8.6 | 2.2 | .27 | .2 | .76 | .5 |
| **sad condition: correct** | 19.0 | | 3.7 | 19.9 | 4.7 | .12 | .6 | -.71 | .5 |
| **sad condition: incorrect** | 9.5 | | 1.9 | 9.6 | 1.9 | .20 | .4 | -.09 | .9 |

**Supplement table 2**: Depicted are reaction time (mean and SD in ms) for correct and incorrect identified changes of emotional face expressions (happy, sad), within- and between-sessions and statistical comparisons and Pearson's correlations. Not corrected for multiple comparisons.

| **Reaction Time** | **1st block** | | **2nd block** | | **Pearson correlation** | | **t-Test** | |
| --- | --- | --- | --- | --- | --- | --- | --- | --- |
| **Block** | **M** | **SD** | **M** | **SD** | **r** | **p** | **t** | **p** |
| happy condition: correct | 527 | 84 | 554 | 80 | **.75** | **.0001** | **-2.2** | **.042** |
| happy condition: incorrect | 522 | 89 | 549 | 101 | **.65** | **.0001** | -1.6 | .1 |
| sad condition: correct | 531 | 47 | 563 | 73 | .32 | .1 | **-2.1** | **.046** |
| sad condition: incorrect | 552 | 71 | 576 | 67 | **.49** | **.017** | -1.6 | .1 |
|  | **1st session** | | **2nd session** | | **Pearson correlation** | | **t-Test** | |
| **Session** | **M** | **SD** | **M** | **SD** | **r** | **p** | **t** | **p** |
| happy condition: correct | 555 | 91 | 527 | 77 | **.69** | **.0003** | 1.9 | .07 |
| happy condition: incorrect | 548 | 118 | 524 | 88 | .39 | .07 | .9 | .3 |
| sad condition: correct | 549 | 54 | 546 | 63 | **.45** | **.032** | .2 | .8 |
| sad condition: incorrect | 572 | 62 | 557 | 81 | .38 | .08 | .9 | .3 |

**Supplement table 3**: Pearson correlation for alpha power at given electrodes and reaction time. Not corrected for multiple comparisons.

| **Reaction time x Power** | | **1st block** | | **2nd block** | | **1st session** | | **2nd session** | |
| --- | --- | --- | --- | --- | --- | --- | --- | --- | --- |
| **r** | **p** | **r** | **p** | **r** | **p** | **r** | **p** |
| **happy face condition** | | |  |  |  |  |  |  |  |
| F8 | .07 | | .7 | .23 | .2 | .15 | .4 | .15 | .4 |
| F7 | .15 | | .4 | .08 | .7 | .11 | .6 | .11 | .6 |
| F4 | .02 | | .8 | .26 | .2 | .05 | .7 | .05 | .7 |
| F3 | .03 | | .8 | .18 | .4 | -.00 | .9 | -.00 | .9 |
| P4 | .11 | | .5 | .19 | .3 | -.03 | .8 | -.03 | .8 |
| P3 | .09 | | .6 | .26 | .2 | .00 | .9 | .00 | .9 |
| P7 | .02 | | .9 | .23 | .2 | -.02 | .9 | -.02 | .9 |
| P8 | -.07 | | .7 | .18 | .3 | -.11 | .6 | -.11 | .6 |
| **sad face condition** | | |  |  |  |  |  |  |  |
| F8 | .22 | | .3 | **.42** | **.045** | .34 | .1 | .30 | .069 |
| F7 | .21 | | .3 | .37 | .083§ | .43 | .039 | .37 | .075§ |
| F4 | .21 | | .3 | **.46** | **.026**§ | .24 | .2 | **.47** | **.024**§ |
| F3 | .18 | | .4 | **.43** | **.038**§ | .20 | .3 | **.41** | **.049**§ |
| P4 | .11 | | .5 | **.50** | **.013**§ | .27 | .2 | **.49** | **.016**§ |
| P3 | .18 | | .4 | **.45** | **.028**§ | .18 | .4 | **.45** | **.029**§ |
| P7 | -.01 | | .9 | **.51** | **.011**§ | .10 | .6 | **.42** | **.044**§ |
| P8 | -.07 | | .7 | **.54** | **.007**§ | .21 | .3 | **.47** | **.021**§ |
| § Statistical comparisons with logarithmic of alpha-power: p< .05 | | | | | | | | | |

**Supplement table 4**: Pearson correlation between alpha asymmetry at given site and reaction time for both conditions. Not corrected for multiple comparisons.

| Reaction time  x Asymmetry | **1st block** | | **2nd block** | | | **1st session** | | | **2nd session** | | | |
| --- | --- | --- | --- | --- | --- | --- | --- | --- | --- | --- | --- | --- |
| **r** | **p** | **r** | **p** | | **r** | | **p** | **r** | | | **p** |
| **sad face condition** | |  |  |  | |  | |  |  | | |  |
| fronto-lateral | -.22 | .3 | **-.43** | **.038** | | -.35 | | .1 | **-.45** | | | **.030** |
| fronto-medial | .12 | .5 | .03 | .8 | | .02 | | .9 | .11 | | | .6 |
| parieto-medial | -.18 | .4 | -.08 | .6 | | .02 | | .9 | -.05 | | | .8 |
| parieto-lateral | -.08 | .7 | -.15 | .4 | | .12 | | .5 | -.17 | | | .4 |
| **happy face condition** | |  |  |  |  | |  | | |  |  | |
| fronto-lateral | -.41 | .051 | -.04 | .8 | -.11 | | .6 | | | -.11 | .6 | |
| fronto-medial | -.10 | .6 | .16 | .4 | .04 | | .8 | | | .04 | .8 | |
| parieto-medial | .02 | .9 | -.25 | .2 | -.17 | | .4 | | | -.17 | .4 | |
| parieto-lateral | -.28 | .1 | -.33 | .1 | -.32 | | .1 | | | -.32 | .1 | |
